# Supplementary material for: miR-379 Inhibits Cell Proliferation, Invasion, and Migration of Vascular Smooth Muscle Cells by Targeting Insulin-Like Factor-1
Source: PubMed Central journal article supplement — Yonsei Med J. 2016 Nov 7;58(1):234–40. doi: 10.3349/ymj.2017.58.1.234 (PMC5122642; doi:10.3349/ymj.2017.58.1.234), 2016-11-07
Supplement: ymj-58-234-s001.pdf [file ymj-58-234-s001.pdf]

**Supplementary Table 1.** Targets of miR-379 as Predicted by TargetScan (A List of 50 Genes are Shown)

| Target gene          | Representative transcript | Gene name                                                                                | 3P-seq tags+5 | Total sites | 8mer sites | 7mer-m8 sites | 7mer-A1 sites | 6mer sites |
|----------------------|---------------------------|------------------------------------------------------------------------------------------|---------------|-------------|------------|---------------|---------------|------------|
| <i>OR5B12</i>        | ENST00000302572.2         | Olfactory receptor, family 5, subfamily B, member 12                                     | 5             | 1           | 1          | 0             | 0             | 0          |
| <i>SDE2</i>          | ENST00000272091.7         | SDE2 telomere maintenance homolog (S. pombe)                                             | 109           | 3           | 1          | 1             | 1             | 0          |
| <i>TFPI2</i>         | ENST00000222543.5         | Tissue factor pathway inhibitor 2                                                        | 11151         | 2           | 1          | 0             | 1             | 0          |
| <i>SVOPL</i>         | ENST00000288513.5         | SVOP-like                                                                                | 5             | 1           | 1          | 0             | 0             | 0          |
| <i>GOS2</i>          | ENST00000367029.4         | G0/G1switch 2                                                                            | 5             | 1           | 1          | 0             | 0             | 0          |
| <i>AC008060.7</i>    | ENST00000401499.1         | HCG2000720; hypothetical gene supported by AK054822; uncharacterized protein             | 5             | 1           | 1          | 0             | 0             | 0          |
| <i>CXCL11</i>        | ENST00000306621.3         | Chemokine (C-X-C motif) ligand 11                                                        | 5             | 1           | 1          | 0             | 0             | 0          |
| <i>AKR1C3</i>        | ENST00000380554.3         | Aldo-keto reductase family 1, member C3                                                  | 253           | 1           | 1          | 0             | 0             | 0          |
| <i>C5orf51</i>       | ENST00000381647.2         | Chromosome 5 open reading frame 51                                                       | 124           | 1           | 1          | 0             | 0             | 2          |
| <i>RMDN2</i>         | ENST00000406384.1         | Regulator of microtubule dynamics 2                                                      | 7             | 1           | 1          | 0             | 0             | 0          |
| <i>CSTB</i>          | ENST00000291568.5         | Cystatin B (stefin B)                                                                    | 203           | 2           | 1          | 0             | 1             | 0          |
| <i>DPPA4</i>         | ENST00000335658.6         | Developmental pluripotency associated 4                                                  | 5             | 1           | 1          | 0             | 0             | 0          |
| <i>LUZPP1</i>        | ENST00000599511.1         | HCG1777807; leucine zipper protein 3; uncharacterized protein                            | 5             | 1           | 1          | 0             | 0             | 0          |
| <i>EIF4G2</i>        | ENST00000526148.1         | Eukaryotic translation initiation factor 4 gamma, 2                                      | 61971         | 0           | 0          | 0             | 0             | 1          |
| <i>C18orf63</i>      | ENST00000579455.1         | Chromosome 18 open reading frame 63                                                      | 5             | 2           | 1          | 0             | 1             | 0          |
| <i>DNM3</i>          | ENST00000367731.1         | Dynamin 3                                                                                | 59            | 4           | 1          | 1             | 2             | 0          |
| <i>GPX3</i>          | ENST00000388825.4         | Glutathione peroxidase 3 (plasma)                                                        | 1142          | 2           | 1          | 1             | 0             | 1          |
| <i>CDKN2AIP</i>      | ENST00000302350.4         | CDKN2A interacting protein                                                               | 2313          | 0           | 0          | 0             | 0             | 0          |
| <i>IL18RAP</i>       | ENST00000264260.2         | Interleukin 18 receptor accessory protein                                                | 5             | 1           | 1          | 0             | 0             | 0          |
| <i>FAM222B</i>       | ENST00000582266.1         | Family with sequence similarity 222, member B                                            | 100           | 0           | 0          | 0             | 0             | 2          |
| <i>INMT</i>          | ENST0000013222.5          | Indolethylamine N-methyltransferase                                                      | 5             | 2           | 0          | 2             | 0             | 0          |
| <i>OGN</i>           | ENST00000262551.4         | Osteoglycin                                                                              | 5             | 1           | 1          | 0             | 0             | 0          |
| <i>PIPOX</i>         | ENST00000323372.4         | Pipecolic acid oxidase                                                                   | 30            | 2           | 0          | 2             | 0             | 0          |
| <i>RPL7</i>          | ENST00000396467.1         | Ribosomal protein L7                                                                     | 271           | 1           | 1          | 0             | 0             | 0          |
| <i>MTMR2</i>         | ENST00000346299.5         | Myotubularin related protein 2                                                           | 625           | 1           | 1          | 0             | 0             | 0          |
| <i>NRARP</i>         | ENST00000356628.2         | NOTCH-regulated ankyrin repeat protein                                                   | 56            | 2           | 1          | 1             | 0             | 0          |
| <i>BMP8B</i>         | ENST00000372827.3         | Bone morphogenetic protein 8b                                                            | 88            | 2           | 1          | 1             | 0             | 1          |
| <i>CBWD5</i>         | ENST00000377384.1         | COBW domain containing 5                                                                 | 5             | 1           | 1          | 0             | 0             | 0          |
| <i>BEX4</i>          | ENST00000372695.5         | Brain expressed, X-linked 4                                                              | 136           | 1           | 1          | 0             | 0             | 0          |
| <i>CTSL</i>          | ENST00000343150.5         | Cathepsin L                                                                              | 4520          | 1           | 1          | 0             | 0             | 0          |
| <i>BPI</i>           | ENST00000451435.1         | Bactericidal/permeability-increasing protein                                             | 5             | 1           | 1          | 0             | 0             | 2          |
| <i>IGF1</i>          | ENST00000337514.6         | Insulin-like growth factor 1 (somatomedin C)                                             | 19            | 1           | 0          | 0             | 1             | 1          |
| <i>NHLRC2</i>        | ENST00000369301.3         | NHL repeat containing 2                                                                  | 368           | 1           | 1          | 0             | 0             | 4          |
| <i>AL031663.2</i>    | ENST00000595203.1         | CDNA FLJ26875 fis, clone PRS08969; uncharacterized protein                               | 22            | 1           | 1          | 0             | 0             | 1          |
| <i>GSDMD</i>         | ENST00000526406.1         | Gasdermin D                                                                              | 145           | 1           | 1          | 0             | 0             | 0          |
| <i>MKX</i>           | ENST00000375790.5         | Mohawk homeobox                                                                          | 165           | 1           | 1          | 0             | 0             | 0          |
| <i>UBE2E3</i>        | ENST00000410062.4         | Ubiquitin-conjugating enzyme E2E 3                                                       | 15            | 0           | 0          | 0             | 0             | 0          |
| <i>SLC6A16</i>       | ENST00000335875.4         | Solute carrier family 6, member 16                                                       | 17            | 1           | 1          | 0             | 0             | 0          |
| <i>RP11-644F5.10</i> | ENST00000550412.1         | Uncharacterized protein                                                                  | 265           | 2           | 0          | 2             | 0             | 1          |
| <i>CBWD1</i>         | ENST00000382393.1         | COBW domain containing 1                                                                 | 5             | 1           | 1          | 0             | 0             | 0          |
| <i>CYP2U1</i>        | ENST00000332884.6         | Cytochrome P450, family 2, subfamily U, polypeptide 1                                    | 202           | 2           | 0          | 1             | 1             | 2          |
| <i>LRRC58</i>        | ENST00000295628.3         | Leucine rich repeat containing 58                                                        | 940           | 4           | 0          | 1             | 3             | 1          |
| <i>RARB</i>          | ENST00000437042.2         | Retinoic acid receptor, beta                                                             | 48            | 2           | 1          | 1             | 0             | 0          |
| <i>ZNF415</i>        | ENST00000597503.1         | Zinc finger protein 415                                                                  | 38            | 2           | 0          | 0             | 2             | 0          |
| <i>HLCS</i>          | ENST00000336648.4         | Holocarboxylase synthetase (biotin-(propionyl-CoA-carboxylase (ATP-hydrolysing)) ligase) | 688           | 2           | 0          | 2             | 0             | 0          |
| <i>RAB30</i>         | ENST00000533486.1         | RAB30, member RAS oncogene family                                                        | 274           | 1           | 0          | 0             | 1             | 0          |
| <i>KRTAP4-2</i>      | ENST00000377726.2         | Keratin associated protein 4-2                                                           | 5             | 2           | 0          | 0             | 2             | 0          |
| <i>COL4A2</i>        | ENST00000360467.5         | Collagen, type IV, alpha 2                                                               | 879           | 1           | 1          | 0             | 0             | 0          |
| <i>CCDC126</i>       | ENST00000307471.3         | Coiled-coil domain containing 126                                                        | 846           | 1           | 0          | 1             | 0             | 1          |
