# Supplementary material for: miR-379 Inhibits Cell Proliferation, Invasion, and Migration of Vascular Smooth Muscle Cells by Targeting Insulin-Like Factor-1
Source: PubMed Central journal article supplement — Yonsei Med J. 2016 Nov 7;58(1):234–40. doi: 10.3349/ymj.2017.58.1.234 (PMC5122642; doi:10.3349/ymj.2017.58.1.234), 2016-11-07
Supplement: ymj-58-234-s002.pdf [file ymj-58-234-s002.pdf]

**Supplementary Table 2.** Differential Expression of miRNAs after PDGF-bb Treatment in VSMCs

| <b>MiRNA</b> | <b>Fold change</b> | <b>p value</b> |
|--------------|--------------------|----------------|
| miR-379      | 0.21               | <0.001         |
| miR-98       | 0.47               | <0.05          |
| miR-599      | 0.61               | <0.01          |
| miR-145a     | 0.87               | 0.14           |
| miR-21       | 0.88               | 0.09           |
| miR-30b      | 1.05               | 0.27           |
| miR-27a      | 1.12               | <0.05          |
| miR-140      | 1.27               | <0.05          |
| miR-146b     | 1.45               | <0.05          |
| miR-541      | 3.12               | <0.01          |

miRNAs, microRNAs; PDGF-bb, platelet-derived growth factor-bb; VSMCs, vascular smooth muscle cells.
